# Supplementary material
Source: HighWire-hosted journal article supplement (https://www.rcpjournals.org/highwire/filestream/14168/field_highwire_adjunct_files/1/Dean_supplementary_material_S2.pdf)

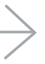

## An effective ward round

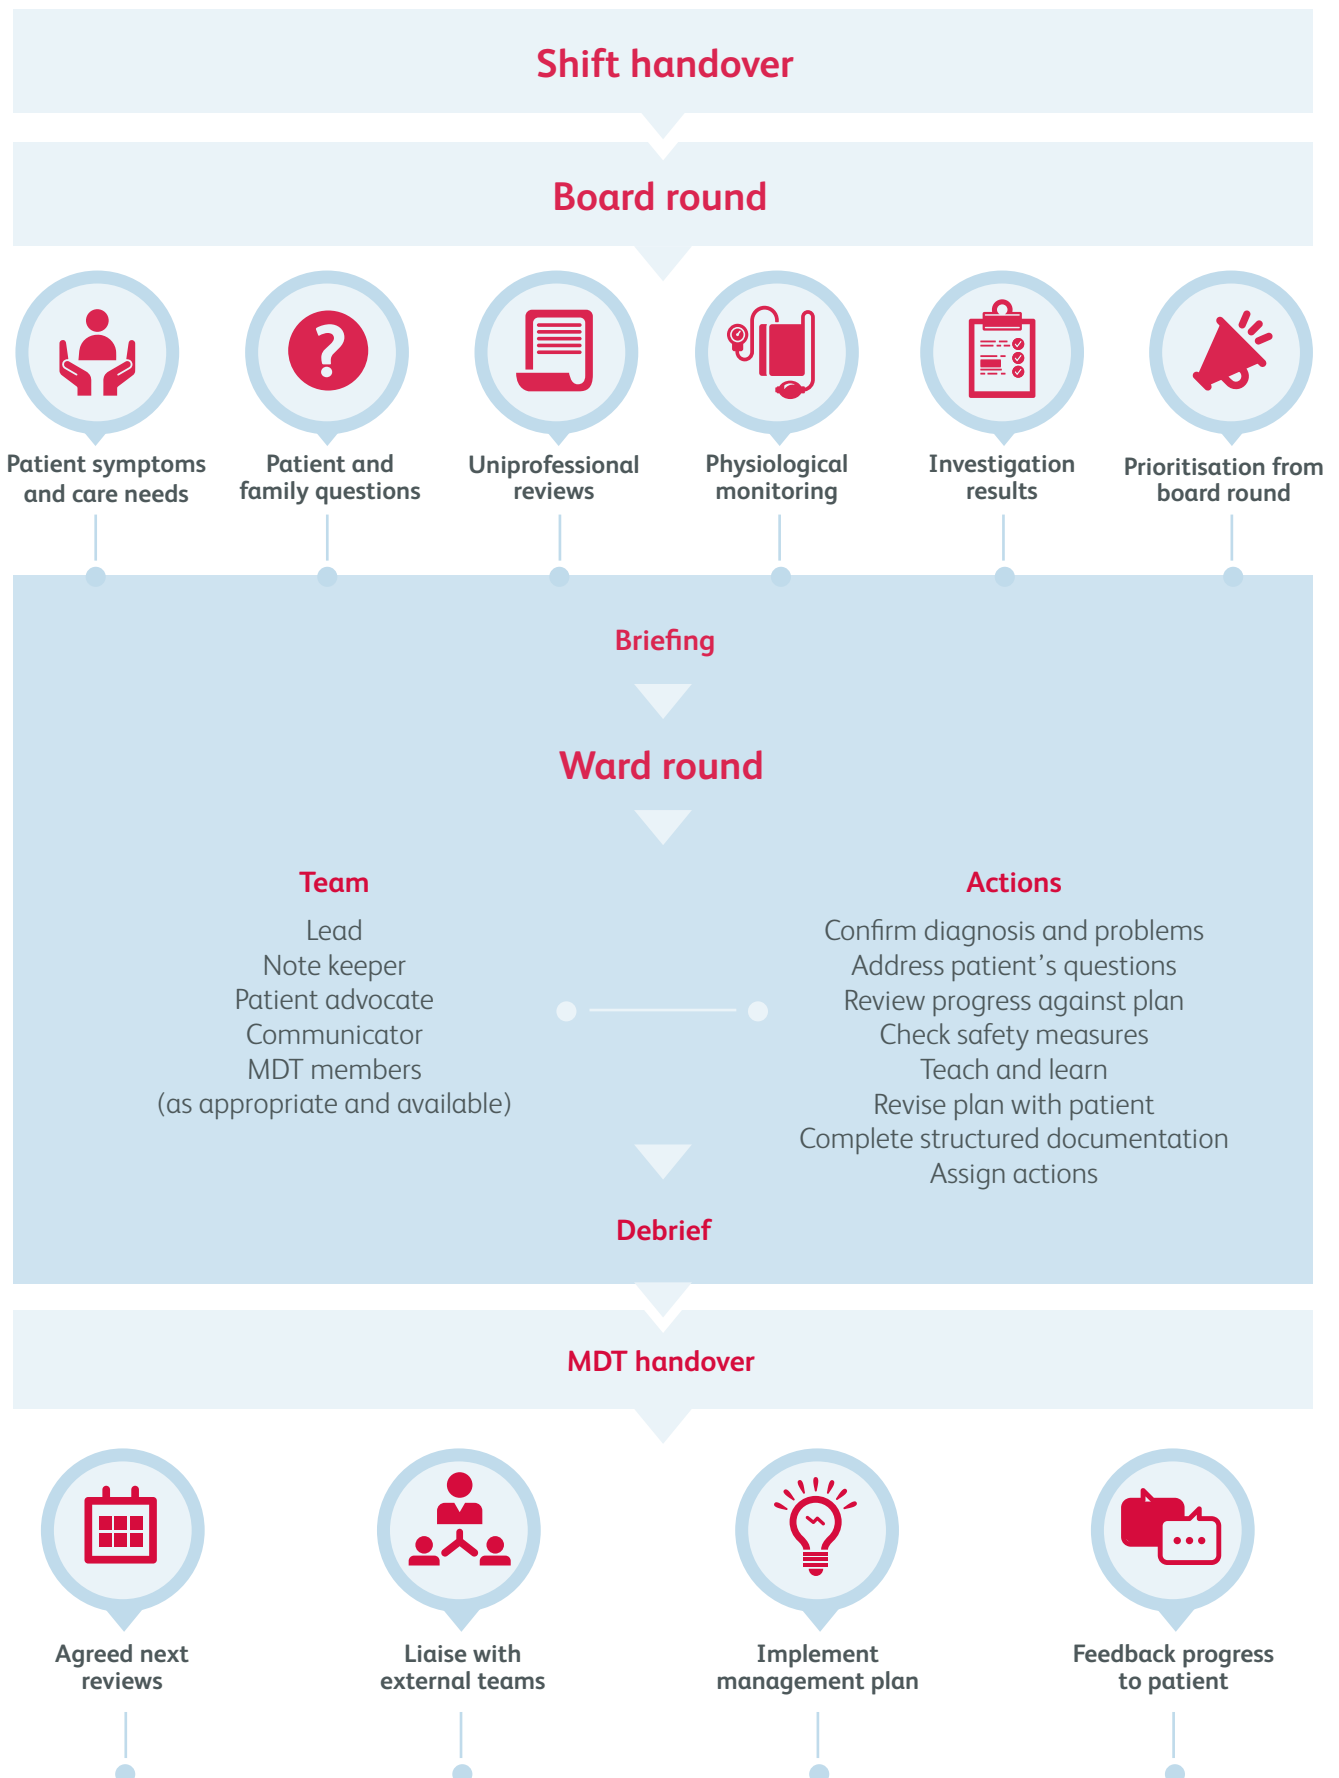

Supplement: Dean_supplementary_material_S2.pdf [file Dean_supplementary_material_S2.pdf]
